# Supplementary material for: Influence of Ethanol Parametrization on Diffusion Coefficients Using OPLS-AA Force Field
Source: MDPI journal article supplement (doi:10.3390/ijms24087316), 2023-04-15
Supplement: s1 [file s1]

# **Supplementary Materials of**

## **Influence of ethanol parametrization on diffusion coefficients using OPLS-AA force field**

Bruno Zêzere<sup>a</sup>, Tiago V. B. Fonseca<sup>a</sup>, Mário M. Q. Simões<sup>b</sup>, Inês Portugal<sup>a</sup>, Carlos M. Silva<sup>a\*</sup>,  
José R. B. Gomes<sup>a\*</sup>

<sup>a</sup>CICECO – Aveiro Institute of Materials, Department of Chemistry, University of Aveiro,  
Campus Universitário de Santiago, 3810-193 Aveiro, Portugal

<sup>b</sup>LAQV-REQUIMTE, Department of Chemistry, University of Aveiro, Campus Universitário de  
Santiago, 3810-193 Aveiro, Portugal

\* Corresponding authors: carlos.manuel@ua.pt; jrgomes@ua.pt

## Potential energy functions

The terms whose sum gives in OPLS-AA the potential energy are of two types, binding and non-binding.

Binding terms correspond to 1) covalent bonds ( $V_{\text{stretching}}$ ):

$$V_{\text{stretching}} = k_{ij}/2 (r_{ij} - r_0)^2 \quad (\text{S1})$$

in which  $r_{ij}$  is the distance between the particle  $i$  and  $j$ ,  $r_0$  is the equilibrium bond length and  $k_{ij}$  is the stretching force constant; 2) angles between two covalent bonds of the same atom ( $V_{\text{angle}}$ ):

$$V_{\text{angle}} = k_{ikj}/2 (\theta_{ikj} - \theta_0)^2 \quad (\text{S2})$$

in which  $\theta_{ikj}$  is the angle between the particles  $i$ ,  $k$  and  $j$ ,  $\theta_0$  is the equilibrium angle and  $k_{ikj}$  is the bending force constant; or 3) angles between two planes, each of two covalent bonds of the same atom, with a common covalent bond (dihedral angles), which can be proper ( $V_{\text{proper dihedrals}}$ ):

$$V_{\text{proper dihedrals}} = \sum_{n=0}^5 k_n (\cos(\theta_{ijkl} - 180))^n \quad (\text{S3})$$

in which  $\theta_{ijkl}$  is the torsion angle between  $i$ ,  $j$ ,  $k$  and  $l$ , and  $k_n$  are the function coefficients, or improper ( $V_{\text{improper dihedrals}}$ ):

$$V_{\text{improper dihedrals}} = k_{ijkl} (1 + \cos(2 \theta_{ijkl} - \theta_0))^n \quad (\text{S4})$$

in which  $k_{ijkl}$  is the force constant from the internal torsions.

Non-binding terms ( $V_{\text{non-bonded}}$ ) correspond to pairs of atoms covalently unbound to each other or the same atom and were calculated accounting for the sum between the van der Waals ( $V_{\text{van der Waals}}$ ) and Coulombic ( $V_{\text{Coulomb}}$ ) interactions. The van der Waals are calculated as:

$$V_{\text{non-bonded}} = 4\varepsilon_{ij} \left[ \left( \frac{\sigma_{ij}}{r_{ij}} \right)^{12} - \left( \frac{\sigma_{ij}}{r_{ij}} \right)^6 \right] + \frac{q_i q_j}{4\varepsilon_r r_{ij}} \quad (\text{S5})$$

in which  $\varepsilon_{ij}$  is the well depth potential energy between the particles  $i$  and  $j$  at  $r_{ij} = 2^{1/6} \sigma_{ij}$ ,  $\sigma_{ij}$  is the distance between  $i$  and  $j$  at which the potential is null,  $q_{ij}$  ( $1 \text{ e} = 1.602176565 \times 10^{-19} \text{ C}$ ) is the charge of particles  $i$  or  $j$ , and  $\varepsilon_r$  is the relative permittivity. The Coulombic are calculated as:

$$V_{\text{non-bonded}} = \frac{q_i q_j}{4\varepsilon_r r_{ij}} \quad (\text{S6})$$

The  $\sigma_{ij}$  and  $\varepsilon_{ij}$  are calculated from the  $i$  and  $j$  atoms  $\sigma$  and  $\varepsilon$  by the geometric combination rules:

$$\sigma_{ij} = (\sigma_i \sigma_j)^{1/2} \quad (\text{S7})$$

$$\varepsilon_{ij} = (\varepsilon_i \varepsilon_j)^{1/2} \quad (\text{S8})$$

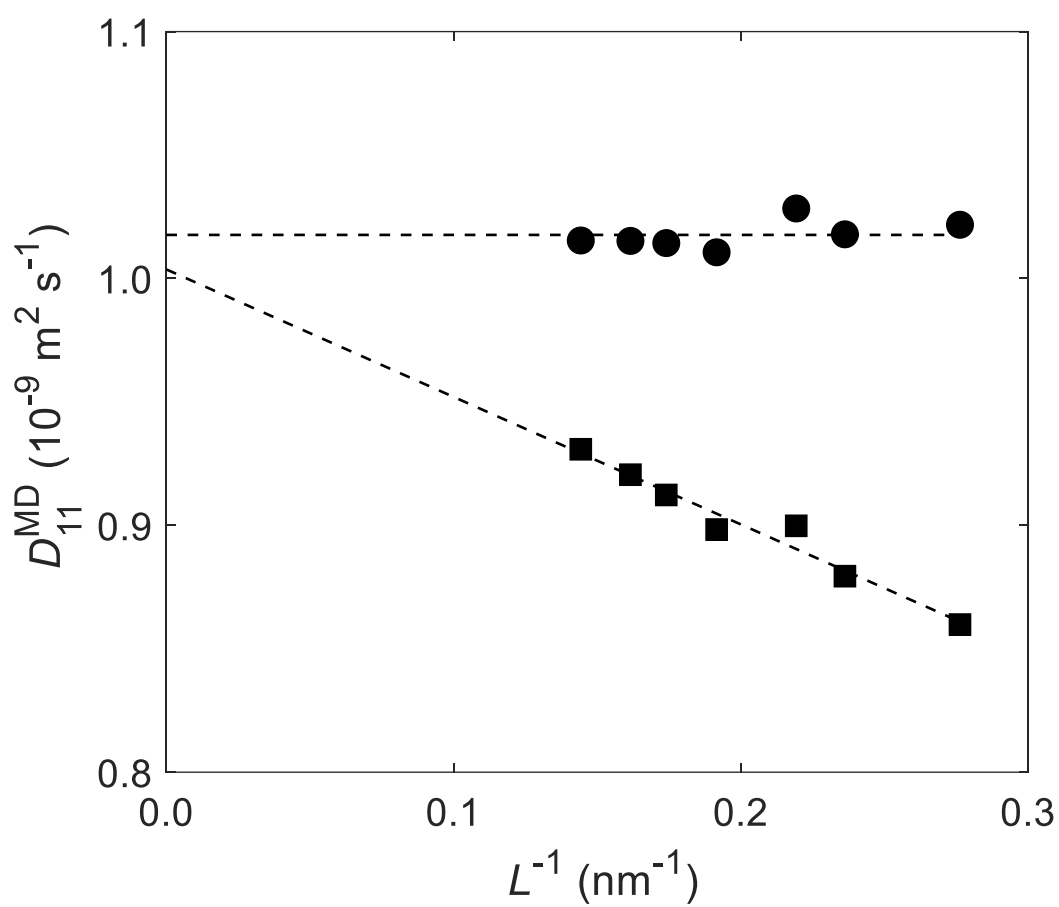

Figure S1 – Ethanol’s self-diffusion coefficient *versus*  $1/L$ , at 298.15 K and 1 bar. The squares represent  $D_{11}^{\text{MD}}$  computed with different box length values and the circles the  $D_{11}^{\text{MD}}$  corrected with the Yeh and Hummer hydrodynamic expressions (Equations (6) and (7)).

Table S1 – Computed diffusion coefficients ( $D_{12}^{MD}$ ) and relative deviations (RD) of quercetin and gallic acid at in liquid ethanol at various  $T$ ,  $P$  and  $\sigma_{OH}$ . Uncertainties ( $\Delta D_{12}^{MD}$ ) only reported whenever 3 data points (NDP) were computed.

| Solute      | $T$<br>(K) | $P$<br>(bar) | $\sigma_{OH}$<br>(nm) | $D_{12}^{MD} \pm \Delta D_{12}^{MD}$<br>( $10^{-9} \text{ m}^2 \text{ s}^{-1}$ ) | NDP | RD<br>(%) |
|-------------|------------|--------------|-----------------------|----------------------------------------------------------------------------------|-----|-----------|
| Quercetin   | 303.15     | 1            | 0.312                 | $0.581 \pm 0.011$                                                                | 3   | 26.61     |
|             | 323.15     | 1            | 0.312                 | $0.897 \pm 0.016$                                                                | 3   | 31.78     |
|             | 303.15     | 1            | 0.310                 | 0.529                                                                            | 1   | 15.28     |
|             | 323.15     | 1            | 0.310                 | 0.756                                                                            | 1   | 11.06     |
|             | 303.15     | 1            | 0.308                 | 0.514                                                                            | 1   | 12.01     |
|             | 323.15     | 1            | 0.308                 | 0.836                                                                            | 1   | 22.81     |
|             | 303.15     | 1            | 0.307                 | $0.469 \pm 0.026$                                                                | 3   | 2.20      |
|             | 303.15     | 150          | 0.307                 | $0.421 \pm 0.006$                                                                | 3   | 1.69      |
|             | 323.15     | 1            | 0.307                 | $0.725 \pm 0.013$                                                                | 3   | 6.51      |
|             | 323.15     | 150          | 0.307                 | $0.670 \pm 0.028$                                                                | 3   | 8.77      |
|             | 303.15     | 1            | 0.306                 | $0.430 \pm 0.014$                                                                | 3   | -6.30     |
|             | 303.15     | 150          | 0.306                 | $0.409 \pm 0.010$                                                                | 3   | -1.21     |
|             | 323.15     | 1            | 0.306                 | $0.702 \pm 0.003$                                                                | 3   | 3.13      |
|             | 323.15     | 150          | 0.306                 | $0.642 \pm 0.036$                                                                | 3   | 4.22      |
|             | 303.15     | 1            | 0.305                 | $0.436 \pm 0.009$                                                                | 3   | -4.99     |
|             | 303.15     | 150          | 0.305                 | $0.381 \pm 0.016$                                                                | 3   | -7.97     |
|             | 323.15     | 1            | 0.305                 | $0.667 \pm 0.018$                                                                | 3   | -2.01     |
|             | 323.15     | 150          | 0.305                 | $0.591 \pm 0.012$                                                                | 3   | -4.06     |
|             | 303.15     | 1            | 0.304                 | 0.387                                                                            | 1   | -15.67    |
|             | 323.15     | 1            | 0.304                 | 0.615                                                                            | 1   | -9.65     |
| Gallic acid | 303.15     | 1            | 0.312                 | $0.656 \pm 0.002$                                                                | 3   | 29.13     |
|             | 323.15     | 1            | 0.312                 | $1.02 \pm 0.03$                                                                  | 3   | 34.43     |
|             | 333.15     | 1            | 0.312                 | $1.22 \pm 0.038$                                                                 | 3   | 35.25     |
|             | 303.15     | 1            | 0.310                 | 0.595                                                                            | 1   | 17.13     |
|             | 333.15     | 1            | 0.310                 | 1.10                                                                             | 1   | 21.55     |
|             | 303.15     | 1            | 0.308                 | 0.538                                                                            | 1   | 5.91      |
|             | 333.15     | 1            | 0.308                 | 1.03                                                                             | 1   | 16.97     |
|             | 303.15     | 1            | 0.307                 | $0.491 \pm 0.010$                                                                | 3   | 3.35      |
|             | 323.15     | 1            | 0.307                 | $0.809 \pm 0.023$                                                                | 3   | 6.73      |
|             | 333.15     | 1            | 0.307                 | $0.978 \pm 0.043$                                                                | 3   | 8.07      |
|             | 303.15     | 1            | 0.306                 | $0.481 \pm 0.014$                                                                | 3   | 5.31      |
|             | 323.15     | 1            | 0.306                 | $0.776 \pm 0.028$                                                                | 3   | 2.37      |
|             | 333.15     | 1            | 0.306                 | $0.960 \pm 0.028$                                                                | 3   | 6.08      |
|             | 303.15     | 1            | 0.305                 | $0.458 \pm 0.009$                                                                | 3   | 9.84      |
|             | 323.15     | 1            | 0.305                 | $0.722 \pm 0.005$                                                                | 3   | 4.75      |
|             | 333.15     | 1            | 0.305                 | $0.916 \pm 0.012$                                                                | 3   | 1.22      |
|             | 303.15     | 1            | 0.304                 | 0.442                                                                            | 1   | 12.99     |
|             | 333.15     | 1            | 0.304                 | 0.848                                                                            | 1   | 6.30      |

Table S2 – Computed diffusion coefficients ( $D_{12}^{\text{MD}}$ ), experimental ( $D_{12}^{\text{exp}}$ ) and relative deviations (RD) of the various solutes in liquid ethanol at various temperatures ( $T$ ) and pressures ( $P$ ), considering  $\sigma_{\text{OH}} = 0.312$  nm and  $\sigma_{\text{OH}} = 0.306$  nm; experimental uncertainties ( $\Delta D_{12}^{\text{exp}}$ ) only reported whenever available.

| Solute     | $T$<br>(K) | $P$<br>(bar) | $D_{12}^{\text{exp}} \pm \Delta D_{12}^{\text{exp}}$<br>( $10^{-9} \text{ m}^2 \text{ s}^{-1}$ ) | $\sigma_{\text{OH}} = 0.312$ nm                                                                | RD<br>(%) | $\sigma_{\text{OH}} = 0.306$ nm                                                                | RD<br>(%) |
|------------|------------|--------------|--------------------------------------------------------------------------------------------------|------------------------------------------------------------------------------------------------|-----------|------------------------------------------------------------------------------------------------|-----------|
|            |            |              |                                                                                                  | $D_{12}^{\text{MD}} \pm \Delta D_{12}^{\text{MD}}$<br>( $10^{-9} \text{ m}^2 \text{ s}^{-1}$ ) |           | $D_{12}^{\text{MD}} \pm \Delta D_{12}^{\text{MD}}$<br>( $10^{-9} \text{ m}^2 \text{ s}^{-1}$ ) |           |
| ibuprofen  | 298.15     | 100          | $0.518 \pm 0.070$                                                                                | $0.685 \pm 0.16$                                                                               | 32.24     | $0.528 \pm 0.011$                                                                              | 1.93      |
|            | 308.15     | 1            | $0.693 \pm 0.070$                                                                                | $0.877 \pm 0.21$                                                                               | 26.55     | $0.686 \pm 0.023$                                                                              | -1.01     |
|            | 308.15     | 300          | $0.581 \pm 0.070$                                                                                | --                                                                                             | --        | $0.567 \pm 0.007$                                                                              | -2.41     |
|            | 323.15     | 1            | $0.928 \pm 0.070$                                                                                | $1.18 \pm 0.2$                                                                                 | 26.94     | $0.936 \pm 0.020$                                                                              | 0.86      |
|            | 323.15     | 300          | $0.754 \pm 0.070$                                                                                | --                                                                                             | --        | $0.754 \pm 0.108$                                                                              | 0.00      |
|            | 333.15     | 100          | $1.04 \pm 0.07$                                                                                  | $1.32 \pm 0.44$                                                                                | 27.12     | $1.04 \pm 0.02$                                                                                | 0.10      |
|            | 333.15     | 200          | $0.986 \pm 0.070$                                                                                | --                                                                                             | --        | $1.03 \pm 0.03$                                                                                | 4.26      |
|            | 333.15     | 300          | $0.910 \pm 0.070$                                                                                | --                                                                                             | --        | $0.927 \pm 0.011$                                                                              | 1.87      |
| butan-1-ol | 298.2      | 1            | 0.927                                                                                            | $1.19 \pm 0.01$                                                                                | 28.48     | $0.920 \pm 0.011$                                                                              | -0.76     |
|            | 333.2      | 1            | 1.84                                                                                             | $2.45 \pm 0.02$                                                                                | 33.20     | $2.00 \pm 0.06$                                                                                | 8.86      |
| propanone  | 303.15     | 1            | $1.94 \pm 0.03$                                                                                  | $1.97 \pm 0.06^*$                                                                              | 1.55      | $1.60 \pm 0.01$                                                                                | -17.63    |
|            | 333.15     | 1            | $2.89 \pm 0.06$                                                                                  | $3.57 \pm 0.10^*$                                                                              | 23.53     | $2.95 \pm 0.16$                                                                                | 2.08      |
| butanal    | 303.15     | 1            | $1.94 \pm 0.07$                                                                                  | $1.84 \pm 0.08^*$                                                                              | -5.15     | $1.47 \pm 0.03$                                                                                | -24.48    |
|            | 333.15     | 1            | $2.68 \pm 0.06$                                                                                  | $3.13 \pm 0.29^*$                                                                              | 16.79     | $2.68 \pm 0.13$                                                                                | -0.07     |
| benzene    | 313.15     | 1            | 2.28                                                                                             | $2.28 \pm 0.08$                                                                                | 0.00      | $1.85 \pm 0.02$                                                                                | -18.86    |
| propane    | 323.15     | 103          | 2.99                                                                                             | $3.10 \pm 0.05$                                                                                | 3.68      | $2.55 \pm 0.08$                                                                                | -14.72    |

\* Data taken from [1].

Table S3 – Computed self-diffusion coefficients of ethanol ( $D_{11}^{\text{MD}}$ ), experimental ( $D_{11}^{\text{exp}}$ ) and relative deviations (RD) at various temperatures ( $T$ ) and pressure value of 1 bar, considering  $\sigma_{\text{OH}} = 0.312$  nm and  $\sigma_{\text{OH}} = 0.306$  nm

| $T$<br>(K) | $D_{11}^{\text{exp}}$<br>( $10^{-9} \text{ m}^2 \text{ s}^{-1}$ ) | $\sigma_{\text{OH}} = 0.312$ nm                                  |           | $\sigma_{\text{OH}} = 0.306$ nm                                  |           |
|------------|-------------------------------------------------------------------|------------------------------------------------------------------|-----------|------------------------------------------------------------------|-----------|
|            |                                                                   | $D_{11}^{\text{MD}}$<br>( $10^{-9} \text{ m}^2 \text{ s}^{-1}$ ) | RD<br>(%) | $D_{11}^{\text{MD}}$<br>( $10^{-9} \text{ m}^2 \text{ s}^{-1}$ ) | RD<br>(%) |
| 298.15     | 1.05                                                              | 1.40                                                             | 33.33     | 1.01                                                             | -3.81     |
| 308.15     | 1.30                                                              | 1.76                                                             | 35.38     | 1.29                                                             | -0.77     |
| 318.15     | 1.68                                                              | 2.18                                                             | 29.76     | 1.61                                                             | -4.17     |
| 328.15     | 2.06                                                              | 2.69                                                             | 30.58     | 2.00                                                             | -2.91     |
| 333.15     | 2.37                                                              | 2.94                                                             | 24.05     | 2.23                                                             | -5.91     |

Table S4 – Computed density of ethanol ( $\rho^{\text{MD}}$ ), experimental ( $\rho^{\text{exp}}$ ) and relative deviations (RD) at various temperatures ( $T$ ) and pressures ( $P$ ), considering  $\sigma_{\text{OH}} = 0.312$  nm and  $\sigma_{\text{OH}} = 0.306$  nm

| $T$<br>(K) | $P$<br>(bar) | $\rho^{\text{exp}}$<br>( $\text{kg m}^{-3}$ ) | $\sigma_{\text{OH}} = 0.312$ nm              |           | $\sigma_{\text{OH}} = 0.306$ nm              |           |
|------------|--------------|-----------------------------------------------|----------------------------------------------|-----------|----------------------------------------------|-----------|
|            |              |                                               | $\rho^{\text{MD}}$<br>( $\text{kg m}^{-3}$ ) | RD<br>(%) | $\rho^{\text{MD}}$<br>( $\text{kg m}^{-3}$ ) | RD<br>(%) |
| 298.15     | 1            | 786                                           | 794                                          | 1.02      | 806                                          | 2.54      |
| 308.15     | 1            | 776                                           | 783                                          | 0.90      | 796                                          | 2.58      |
| 308.15     | 300          | 795                                           | 805                                          | 0.63      | 817                                          | 2.77      |
| 318.15     | 1            | 767                                           | 771                                          | 0.26      | 785                                          | 2.08      |
| 328.15     | 1            | 759                                           | 759                                          | 0.00      | 773                                          | 1.84      |
| 333.15     | 1            | 754                                           | 754                                          | -0.29     | 768                                          | 1.59      |
| 333.15     | 300          | 782                                           | 780                                          | -0.13     | 793                                          | 1.41      |

Table S5 – Number of solute molecules used for each system simulated.

| Solute      | No. of molecules |
|-------------|------------------|
| quercetin   | 4                |
| gallic acid | 7                |
| ibuprofen   | 7                |
| butan-1-ol  | 12               |
| propanone   | 15               |
| butanal     | 13               |
| benzene     | 12               |
| propane     | 20               |

## References

- [1] B. Zêzere, I. Portugal, C.M. Silva, J.R.B. Gomes, Diffusivities of ketones and aldehydes in liquid ethanol by molecular dynamics simulations, *J. Mol. Liq.* 371 (2023) 121068. <https://doi.org/10.1016/j.molliq.2022.121068>.
